# Supplementary material
Source: PubMed Central journal article supplement (PMC3322475)
Supplement: cc1014_2380SD1.pdf [file cc1014_2380SD1.pdf]

**Figure S1.** P53-expression analysis of HCT116 and PA1 cells transduced with shRNA against p53 (A) HCT116 cells. (B) As PA1 cells showed lowered cell viability after retrovirus infection, the vector containing shRNA against p53 was transfected to PA1 cells and 12 clones were obtained (Top). Clone 10 and 12 showed efficient knock down of p53.

**Figure S2.** RT-PCR analysis of p53AIP1 and its isoforms. HCT116 and HCT116 p53<sup>-/-</sup> cells were treated with or without ADR or 5FU and subjected for RT-PCR analysis.

**Figure S3.** Efficiency of gene silencing of p53 target genes HCT116 cells were transfected with siRNA either control or against the genes described in the figure. They were subjected for protein gel blot analysis.

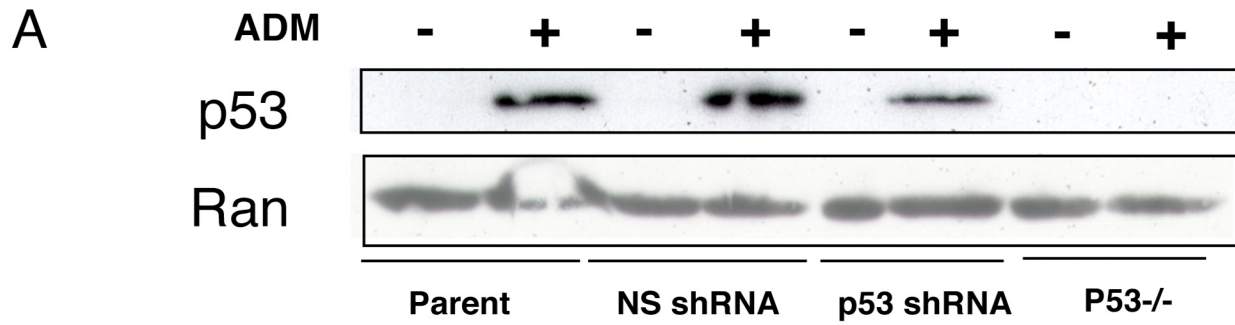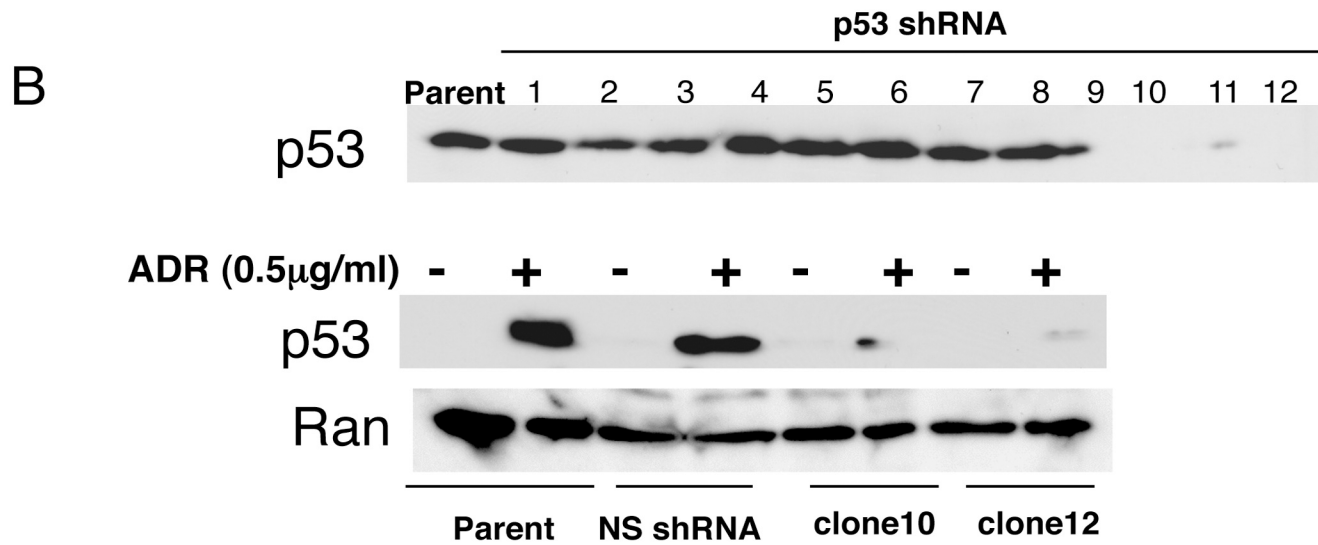

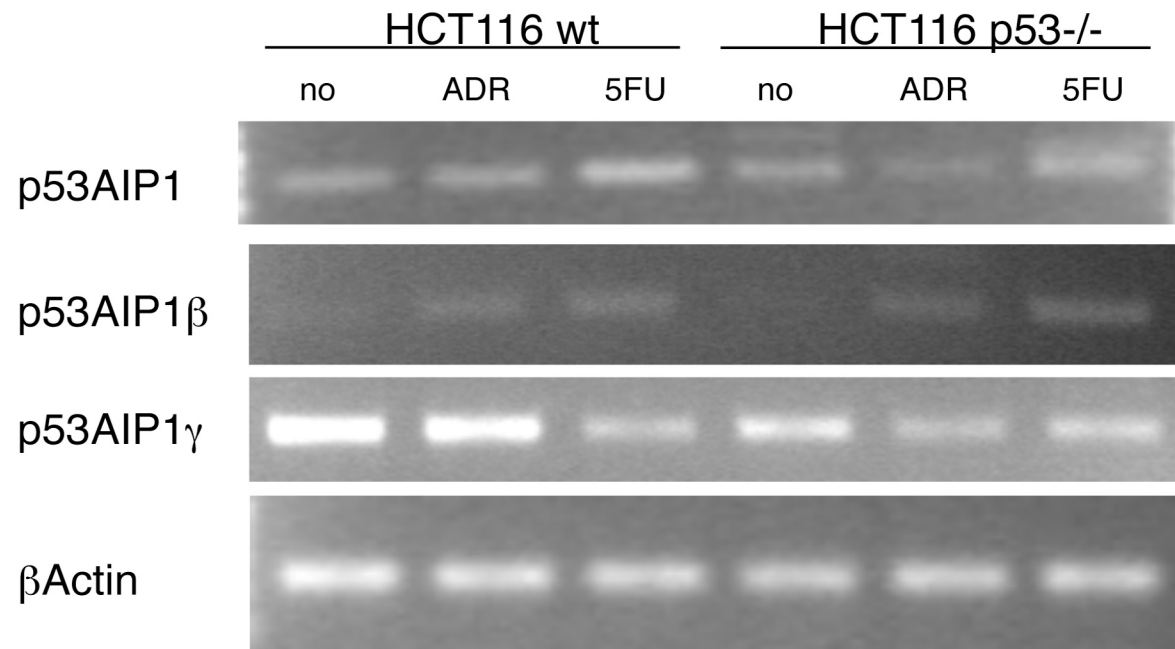

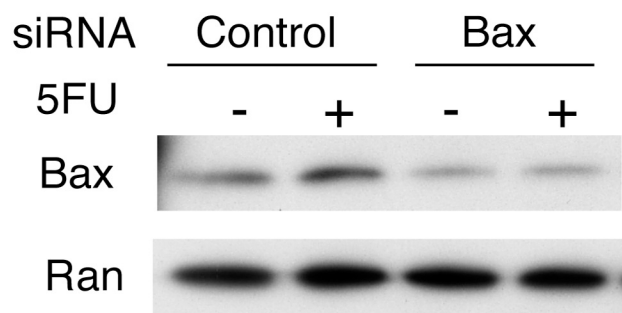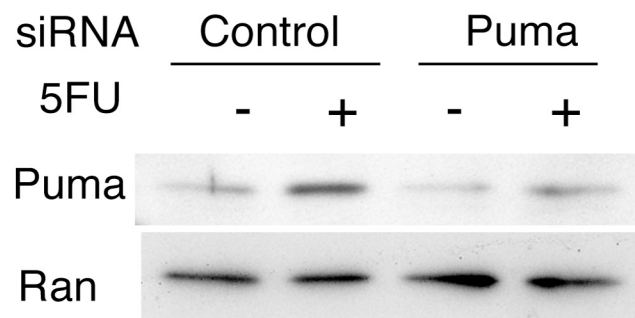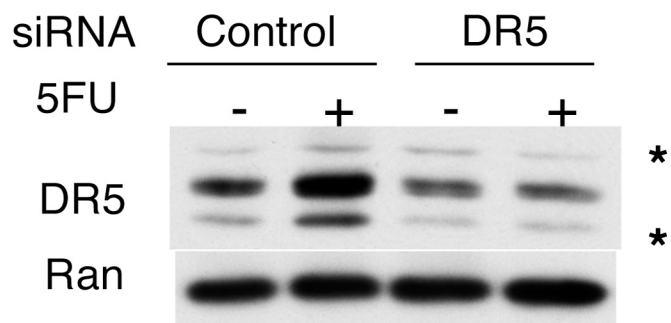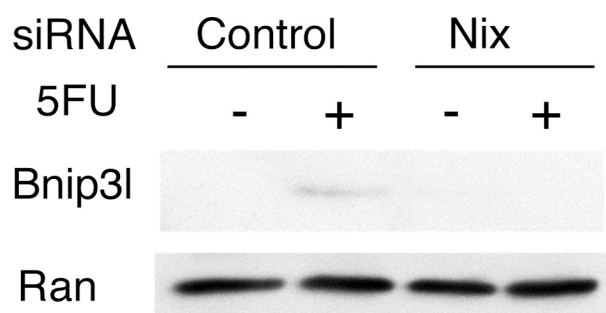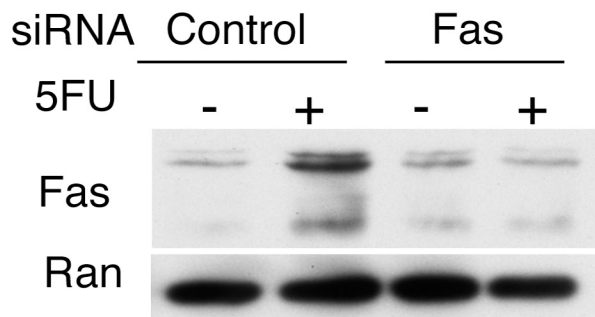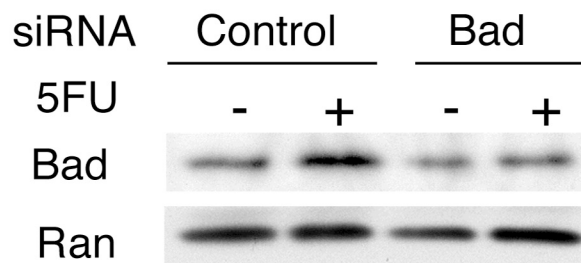

Supplementary Figure3
